# Supplementary material
Source: PubMed Central journal article supplement (PMC8881887)
Supplement: mmc1.pdf [file mmc1.pdf]

## Electronic Supplementary Material

### A Stability Indicating RP-HPLC Method for Determination of the COVID-19 Drug Molnupiravir Applied Using Nanoformulations in Permeability Studies

Tuba Reçber<sup>1a</sup>, Selin Seda Timur<sup>2a</sup>, Sevilay Erdoğan<sup>1</sup>, Fatma Yalçın<sup>3</sup>, Tutku Ceren Karabulut<sup>3,4</sup>, R. Neslihan Gürsoy<sup>2</sup>, Hakan Eroğlu<sup>2</sup>, Sedef Kır<sup>1</sup>, Emirhan Nemetlu<sup>1\*</sup>

<sup>1</sup>Hacettepe University, Faculty of Pharmacy, Department of Analytical Chemistry, 06100, Sıhhiye, Ankara, Turkey

<sup>2</sup>Hacettepe University, Faculty of Pharmacy, Department of Pharmaceutical Technology, 06100, Sıhhiye, Ankara, Turkey

<sup>3</sup>Tobio Novelfarma Drug Industry and Trade Limited Company, 34768, Ümraniye, İstanbul, Turkey, Turkey

<sup>4</sup>Ankara University, Faculty of Pharmacy, Department of Analytical Chemistry, 06100, Tandoğan, Ankara, Turkey

\*Author to whom correspondence should be addressed; E-Mail: [enemetlu@hacettepe.edu.tr](mailto:enemetlu@hacettepe.edu.tr)

<sup>a</sup>These authors have equally contributed to this manuscript.

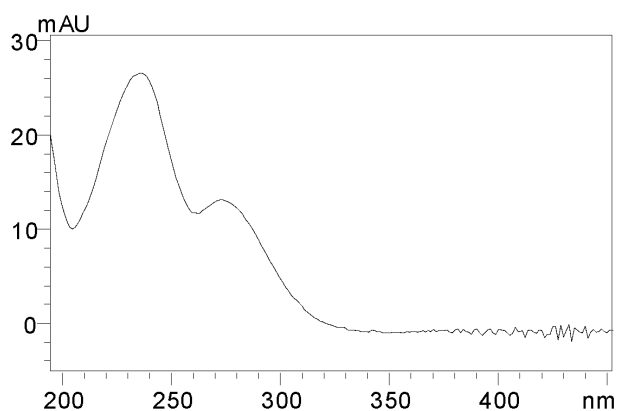

**Supplementary Figure 1:** UV spectrum of MLP.

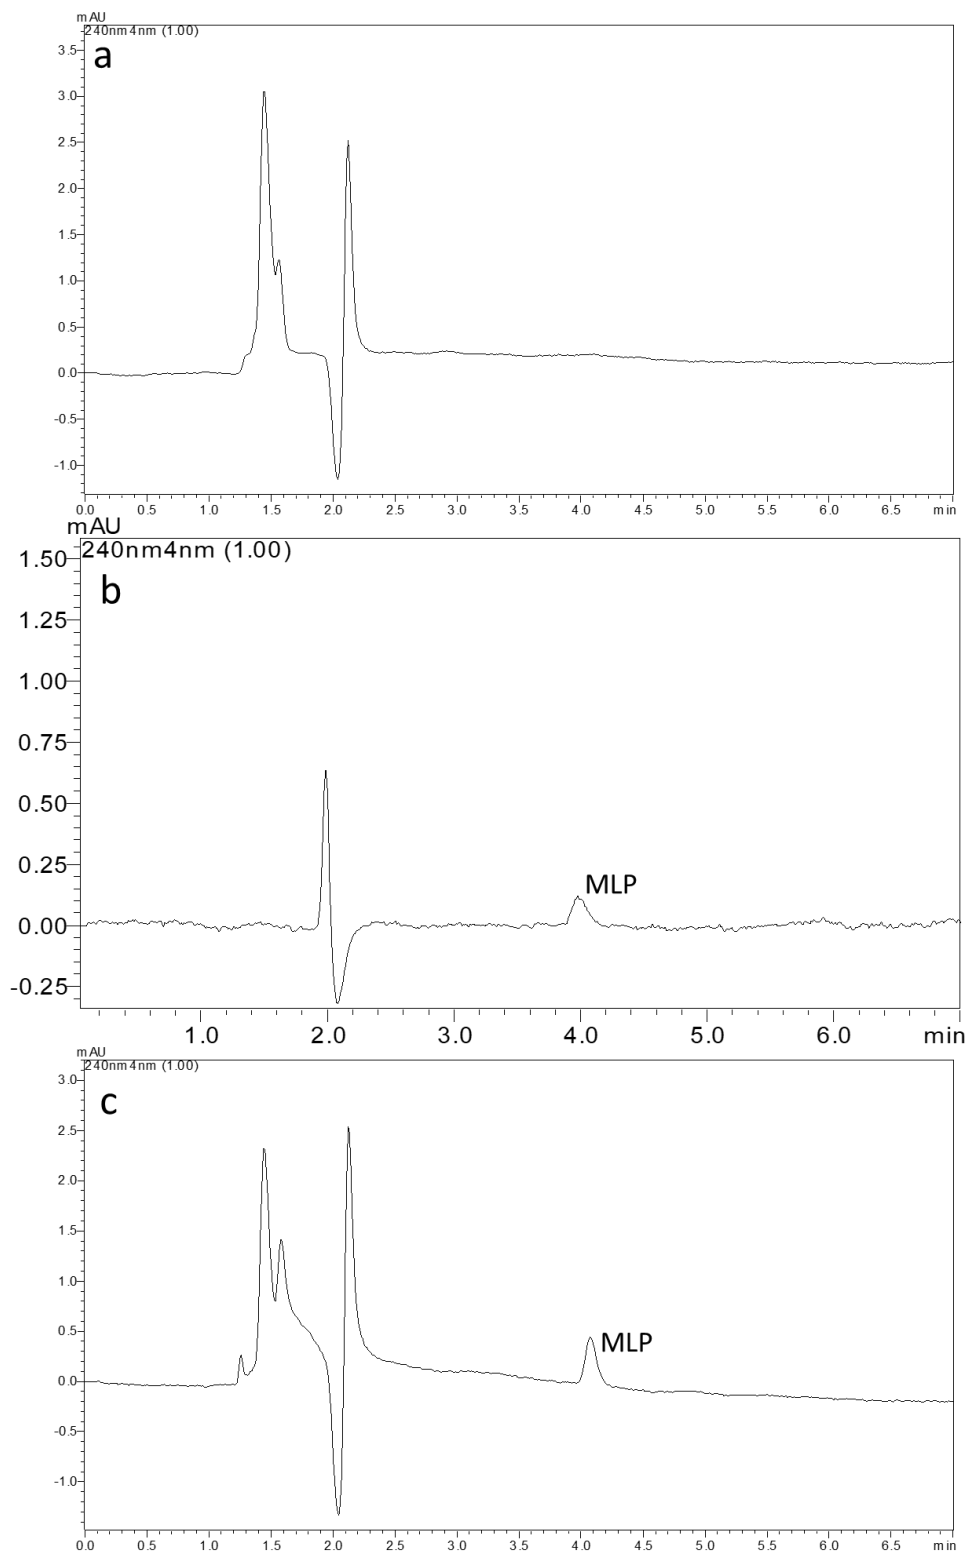

**Supplementary Figure 2:** Chromatograms obtained under optimum chromatographic conditions; a) blank for MLP b) MLP standard spiked matrix at LOD (0.05  $\mu\text{g/mL}$ ) concentration c) MLP standard spiked matrix at LOQ (0.10  $\mu\text{g/mL}$ ) concentration.

Identification of degradation products of MLP was performed using a high-resolution mass spectrometry analysis with liquid chromatography method. Degradation conditions were applied as described in section 2.7 and solutions were analyzed on a C18 column (2.1 x 50 mm, 1.8  $\mu$ m) and LC-qTOF-MS system (Agilent 6530). The mobile phase included solvent A (0.1% formic acid in water) and solvent B (0.1% formic acid in acetonitrile) with gradient elution (Supplementary Table 1). The flow rate was adjusted to 0.3 mL/min. The injection volume was 10  $\mu$ L. MS analysis was done using negative and positive ionization modes. The LC-qTOF-MS instrument parameters were given in Supplementary Table 2.

**Supplementary Table 1.** Gradient elution program

| <b>Time (min)</b> | <b>% Mobile Phase B*</b> |
|-------------------|--------------------------|
| 0                 | 10                       |
| 1                 | 10                       |
| 10                | 90                       |
| 11                | 90                       |
| 15                | 10                       |
| 25                | 10                       |

\*% 0.1 FA in acetonitrile

**Supplementary Table 2.** LC-qTOF-MS instrument parameters

|                                 | <b>Positive ionization</b> | <b>Negative ionization</b> |
|---------------------------------|----------------------------|----------------------------|
| <b>Mass range</b>               | 100-1700 amu               | 100-1700 amu               |
| <b>Scan Speed (spectrum/sn)</b> | 2                          | 2                          |
| <b>Spray voltage (kV)</b>       | 3500                       | 3500                       |
| <b>Skimmer voltage (V)</b>      | 65                         | 65                         |
| <b>Gas temperature (°C)</b>     | 325                        | 325                        |
| <b>Gas flow rate (L/dak)</b>    | 10                         | 10                         |
| <b>Nebulizer (psi)</b>          | 45                         | 45                         |

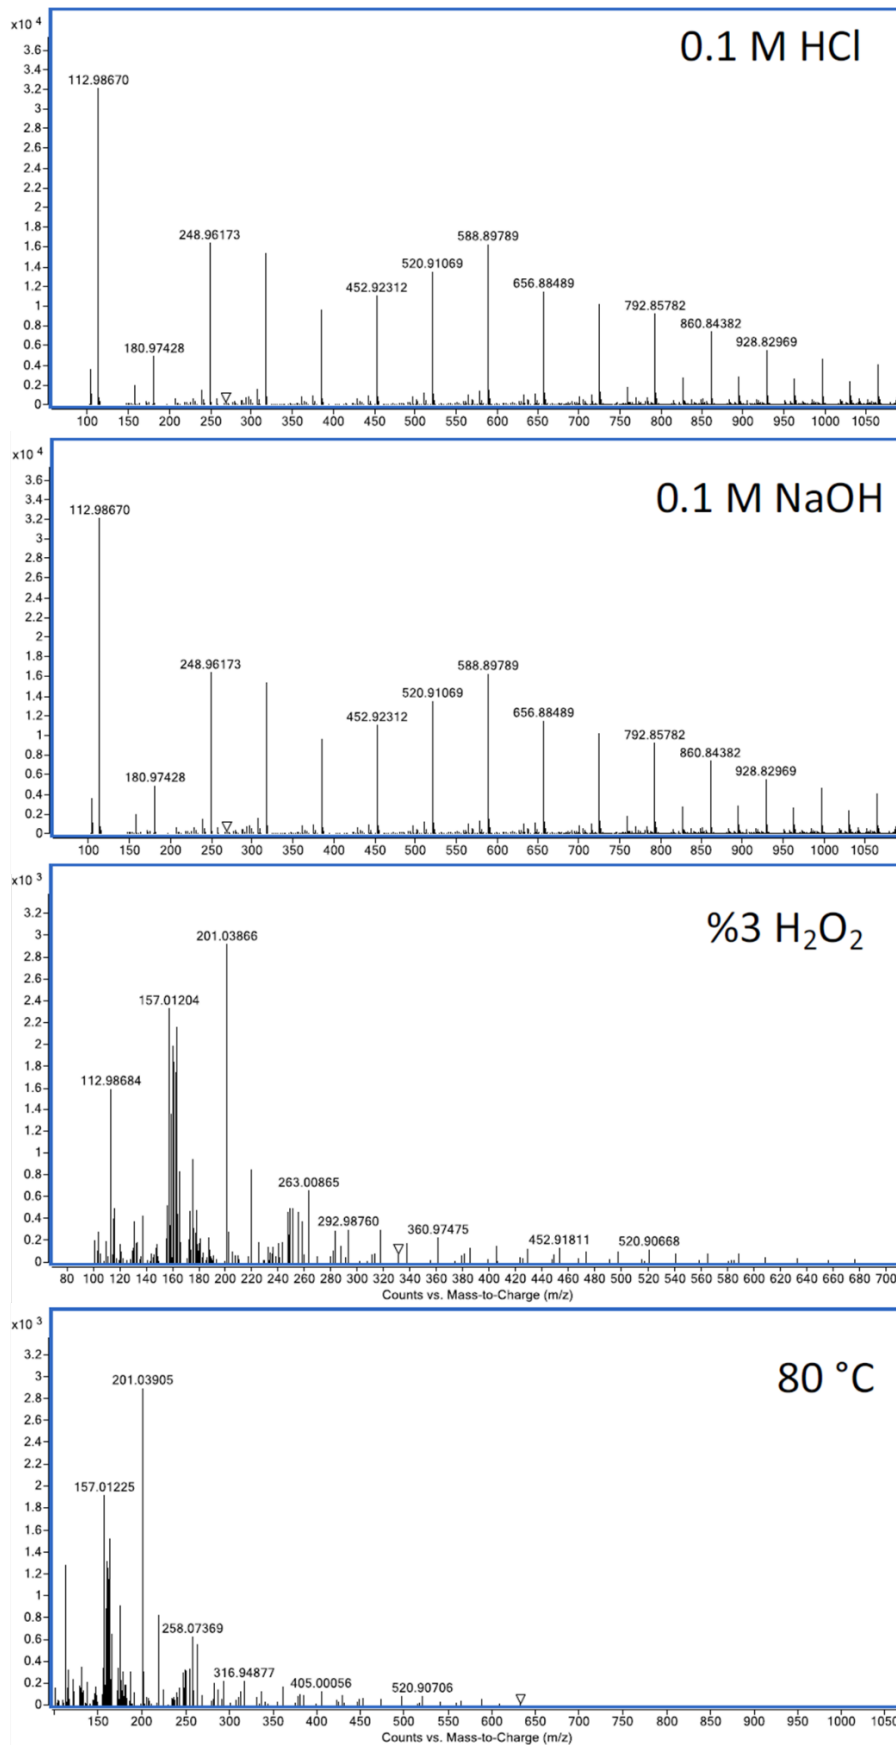

**Supplementary Figure 3:** High-resolution MS spectrum of MLP degradation products at different forced degradation conditions. Ionization mode: Negative

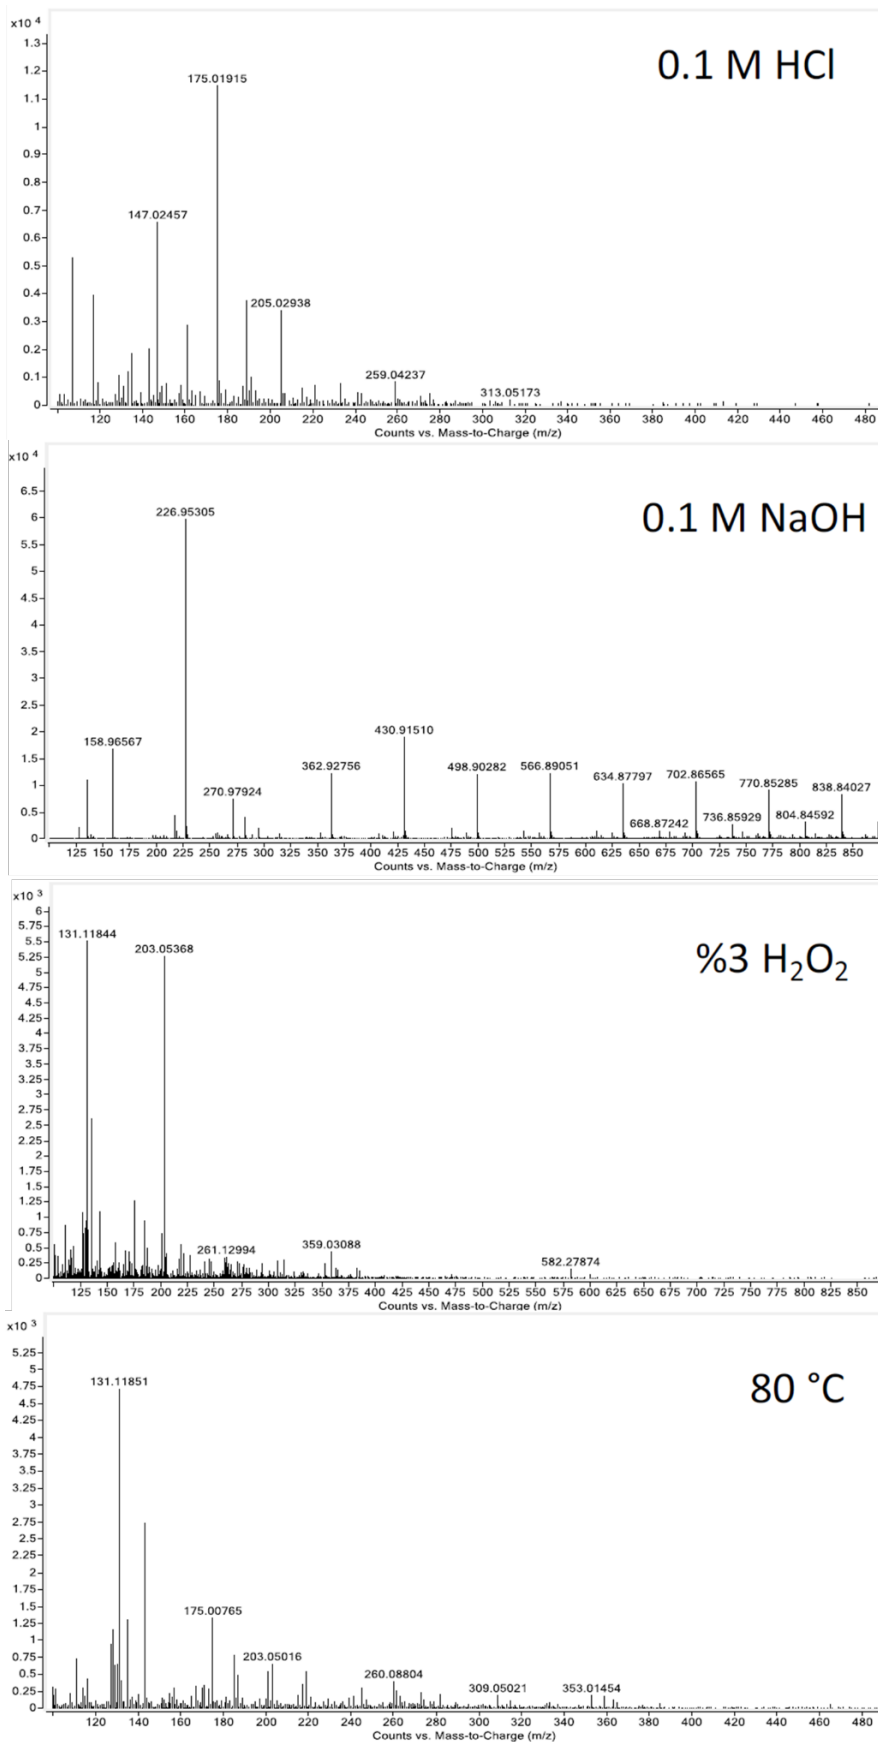

**Supplementary Figure 5:** High-resolution MS spectrum of MLP degradation products at different forced degradation conditions. Ionization mode: Positive

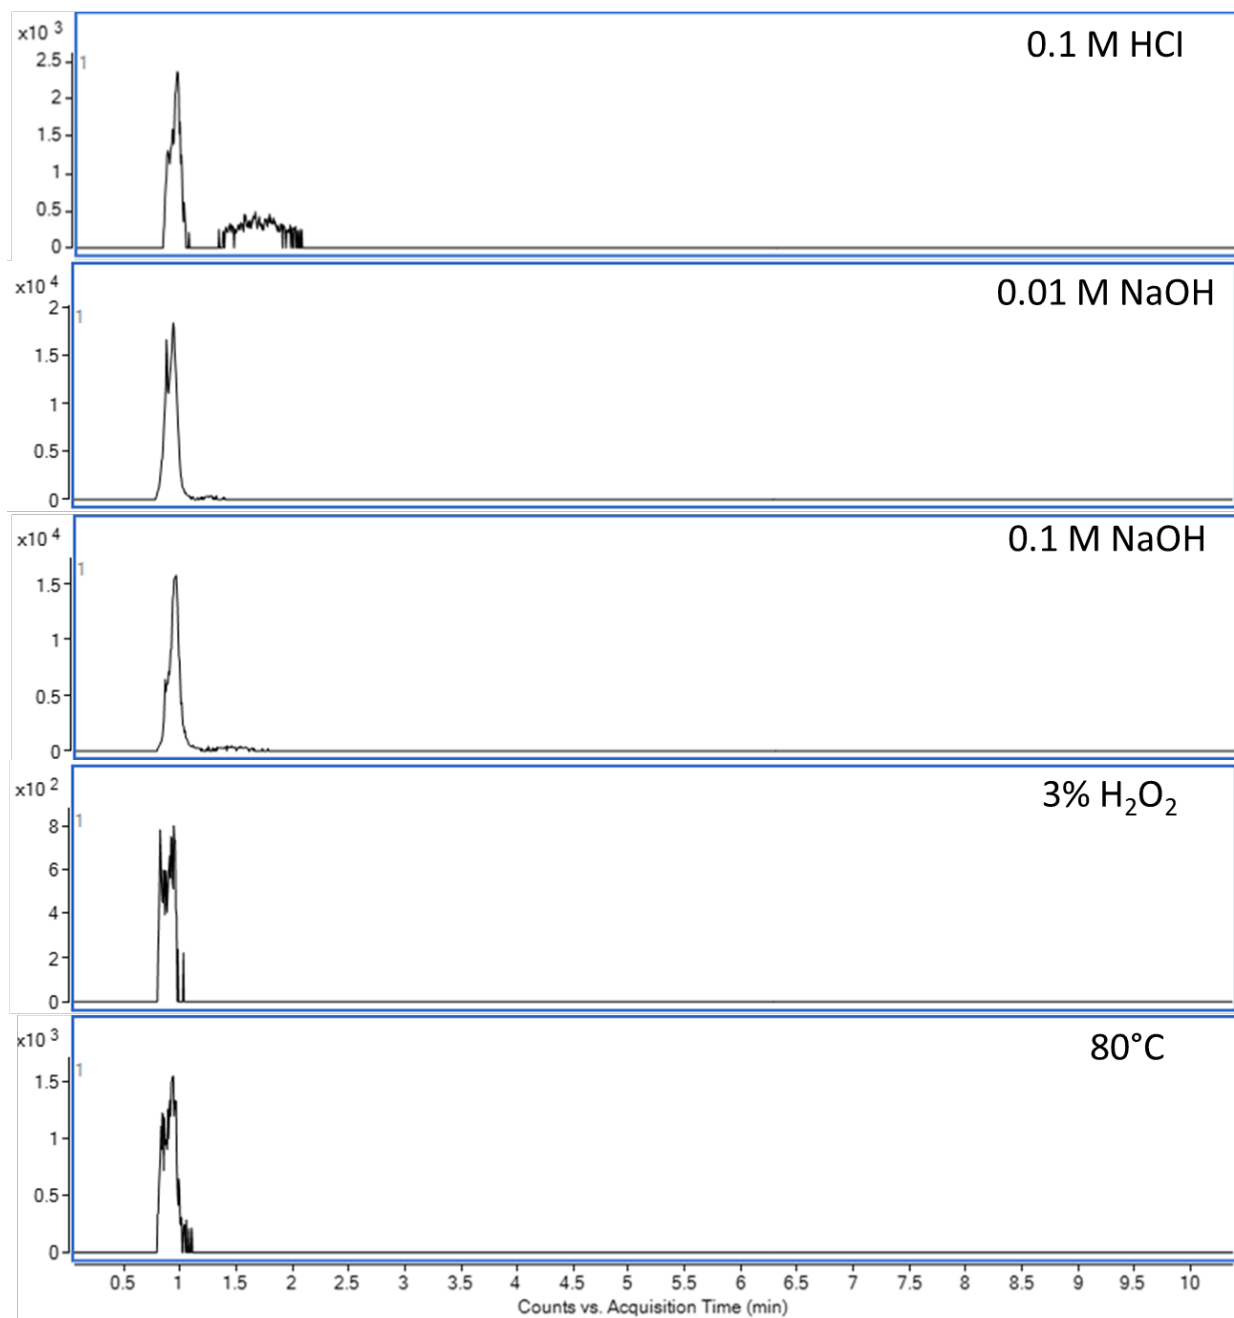

**Supplementary Figure 5:** Extracted ion chromatograms of MLP at 258 m/z for  $\beta$ -d-N4-hydroxycytidine presences at different forced degradation conditions. Ionization mode: Negative
